# Supplementary material for: Synthesis and Biological Evaluation of RGD-Conjugated MEK1/2 Kinase Inhibitors for Integrin-Targeted Cancer Therapy
Source: PubMed Central journal article supplement (PMC6269693; doi:10.3390/molecules181113957), 2013-11-12
Supplement: molecules-18-13957-s001.pdf [file molecules-18-13957-s001.pdf]

# Supplementary Materials

## 1. HRMS Spectrogram

Figure S1. MS spectrogram of conjugate 9a.

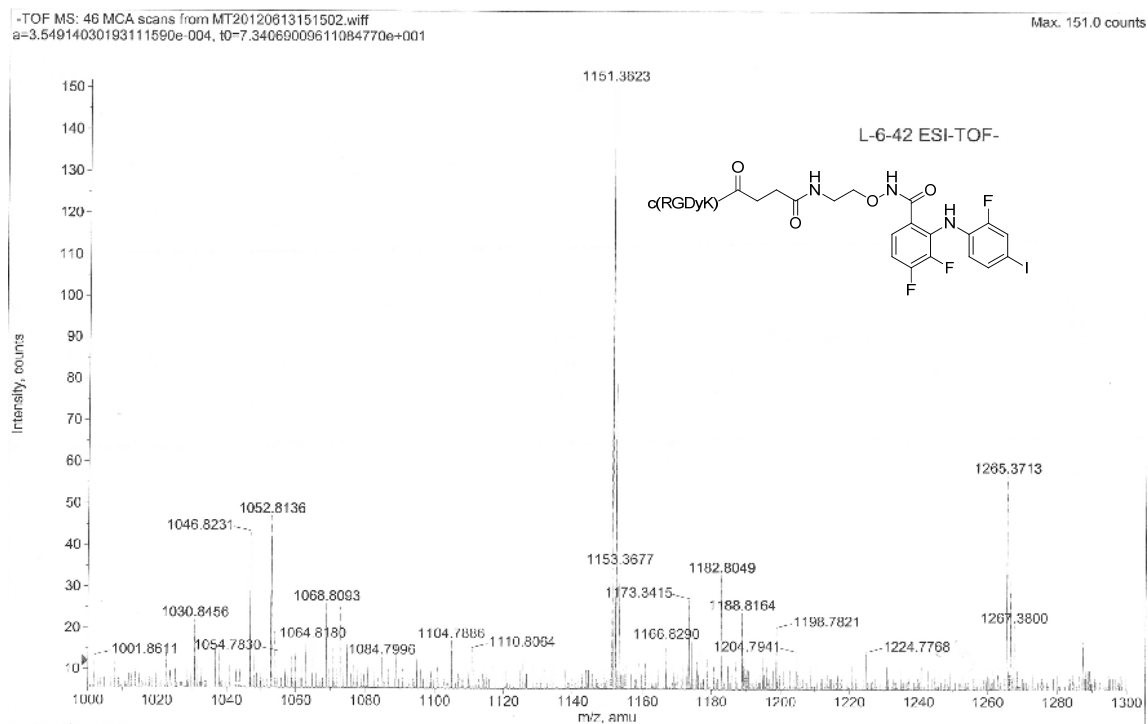

Figure S2. MS spectrogram of conjugate 9b.

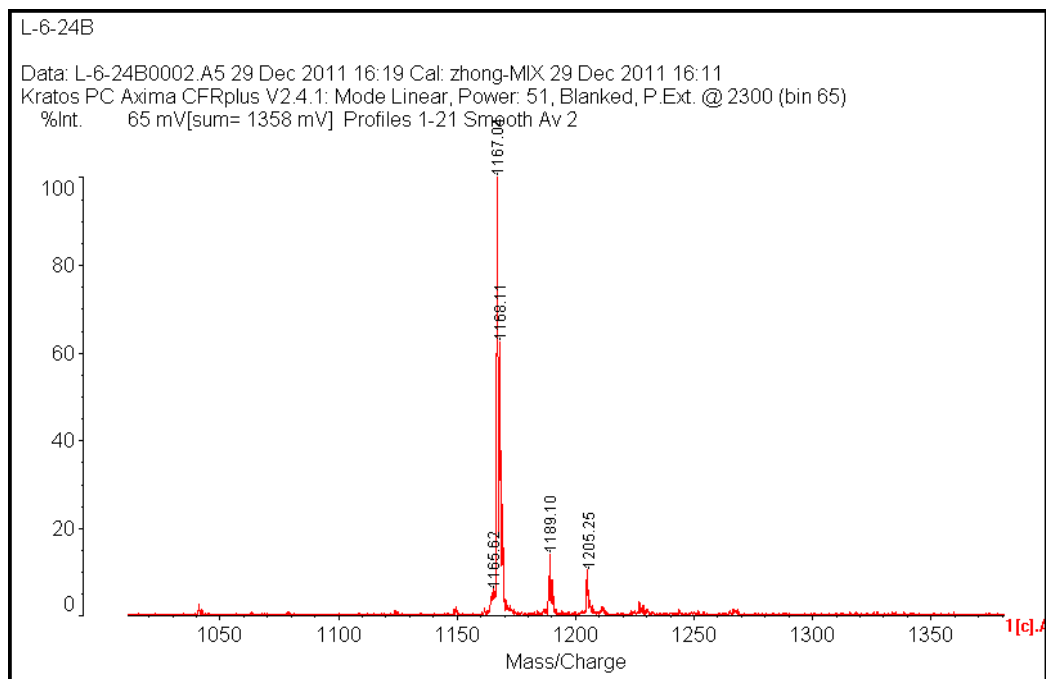

Figure S3. MS spectrogram of conjugate 9c.

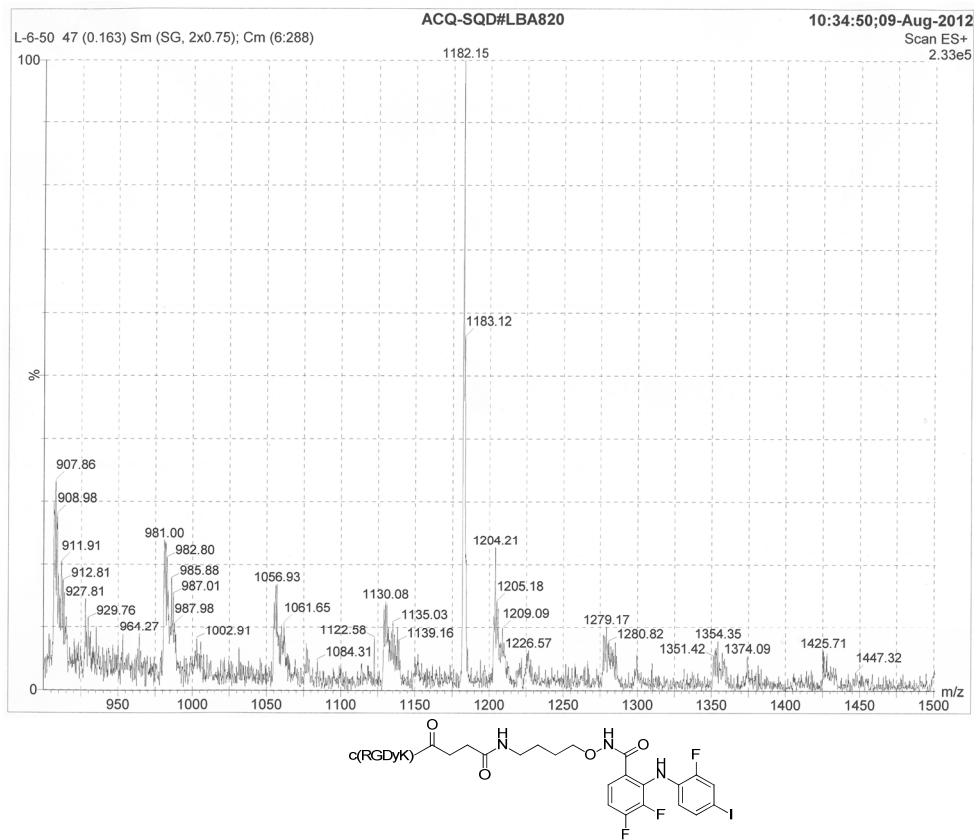

Figure S4. MS spectrogram of conjugate 9d.

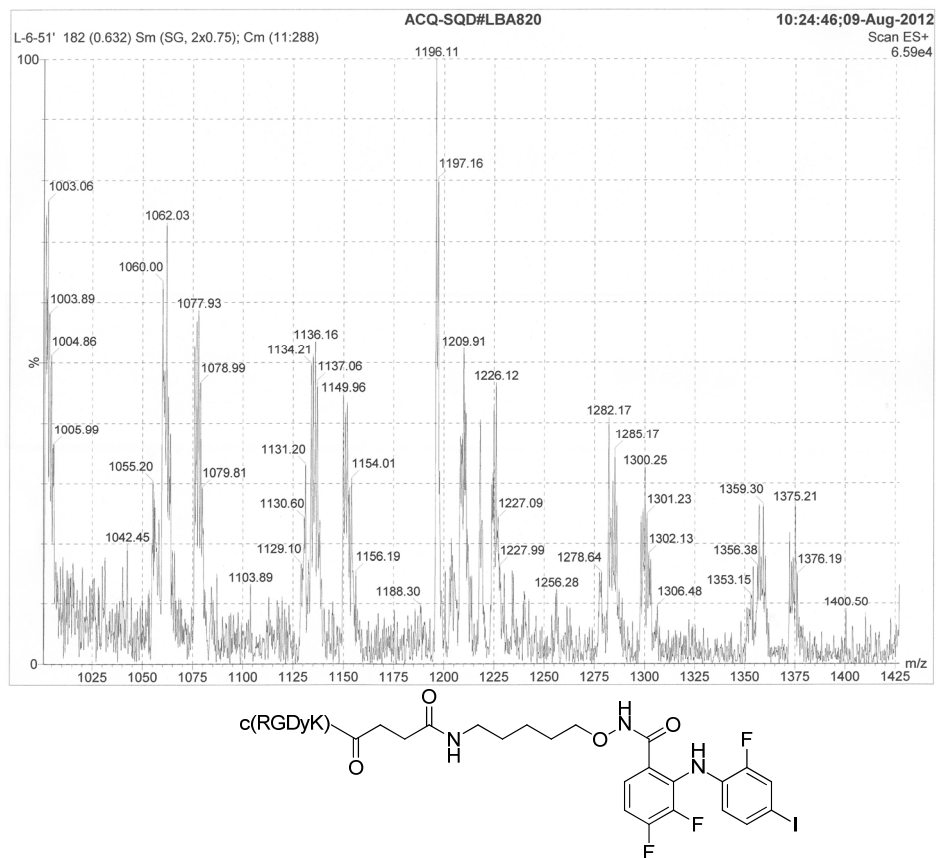

Figure S5. MS spectrogram of conjugate 9e.

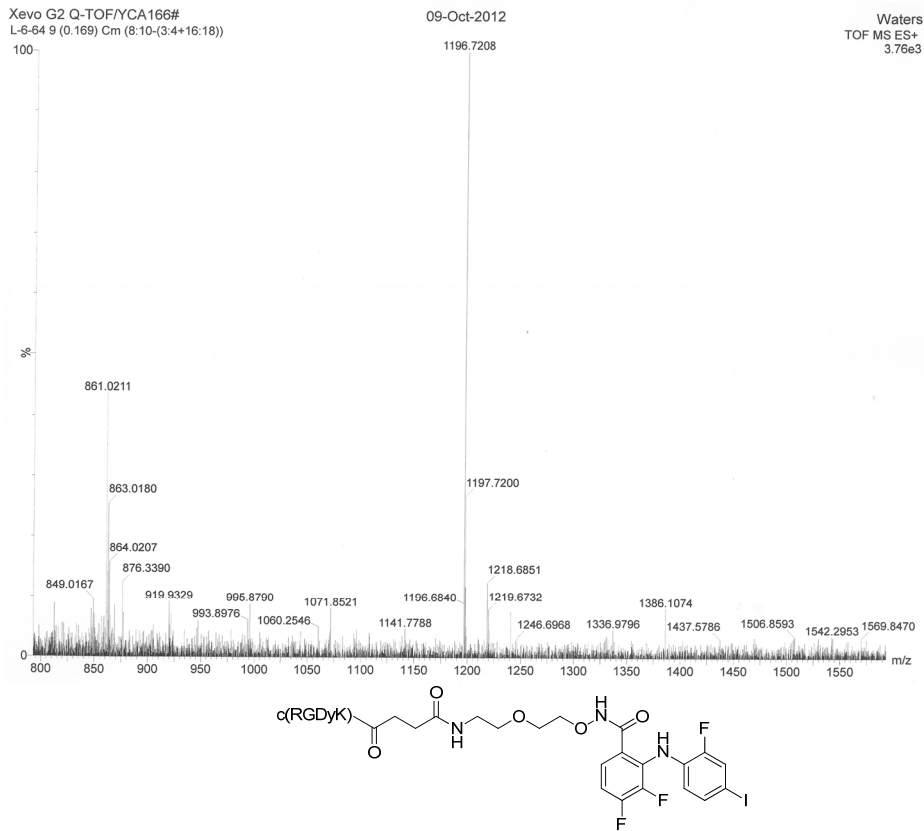

Figure S6. MS spectrogram of conjugate 9f.

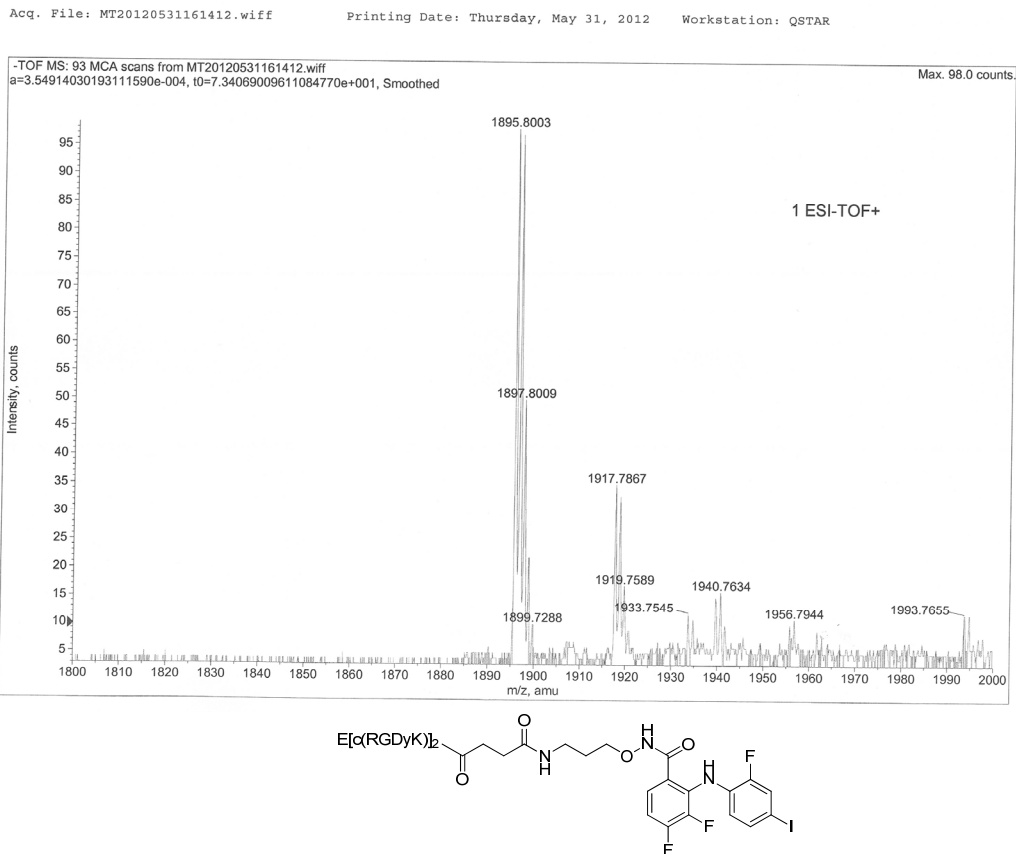

Figure S7. MS spectrogram of conjugate 9g.

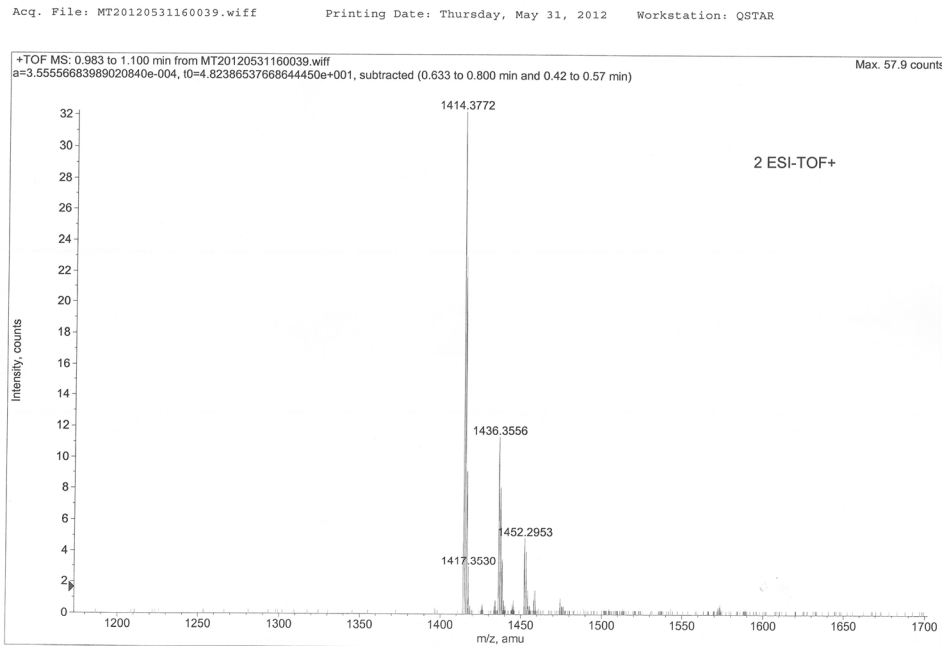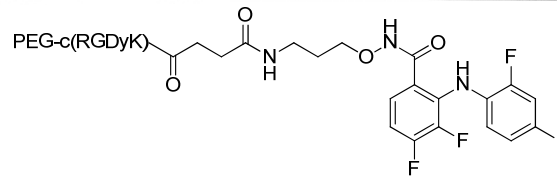

Figure S8. MS spectrogram of conjugate 9h.

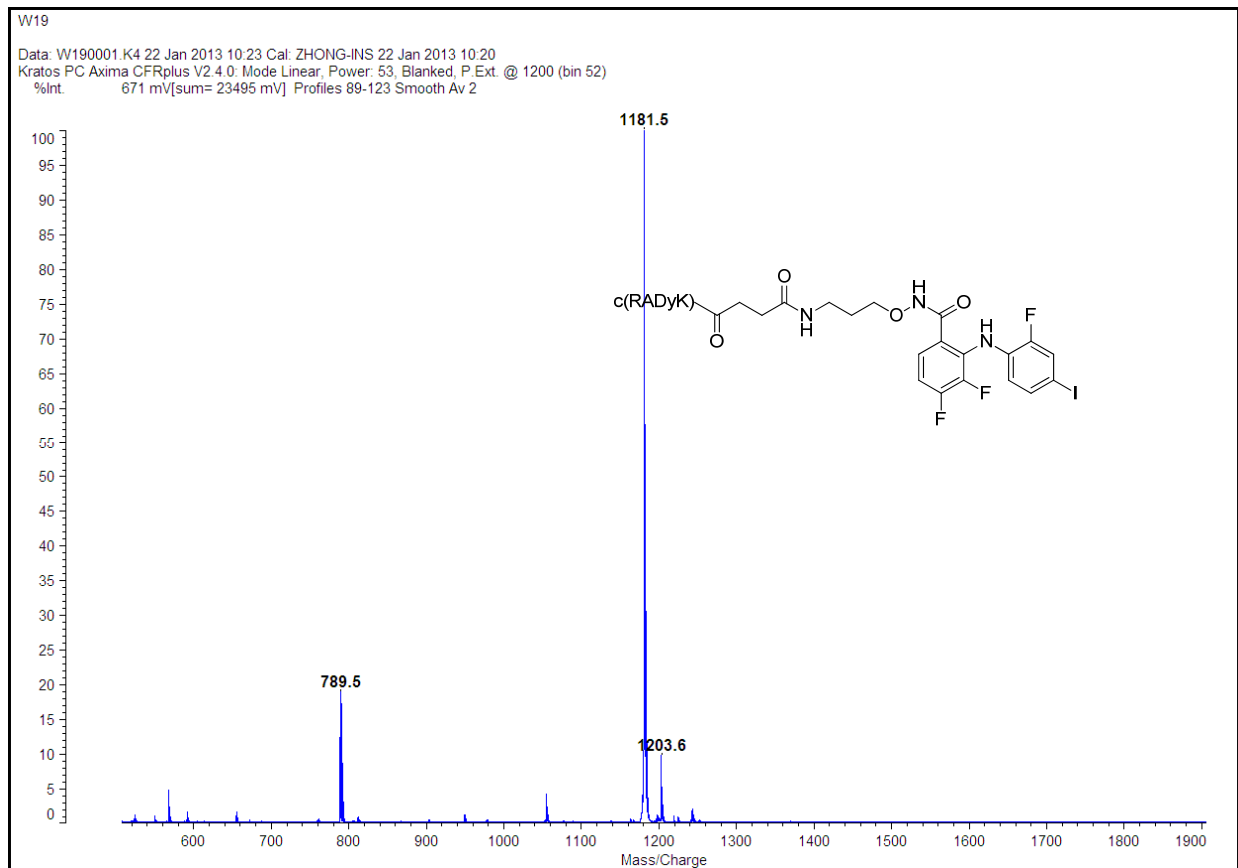

Figure S9. MS spectrogram of conjugate 13.

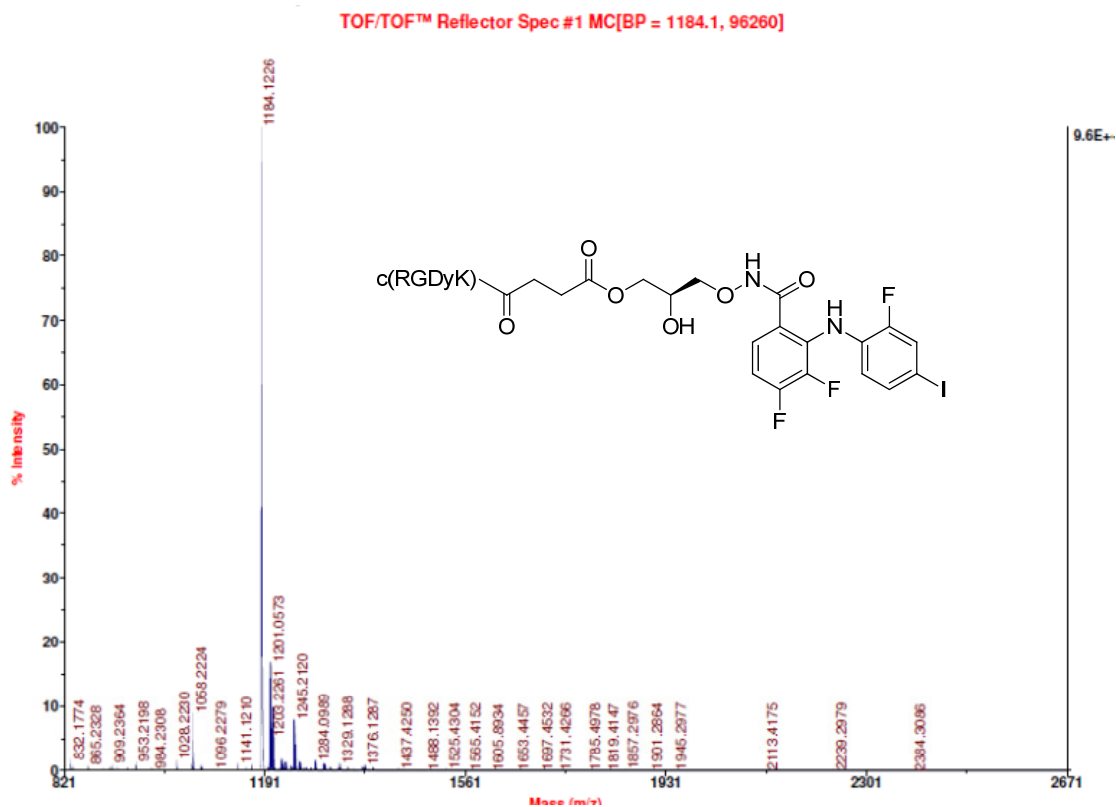

## 2. HPLC Data

### 2.1. HPLC Data of Conjugate 9a

Sample: 9a

HPLC Column; Gemini 5  $\mu$ m C18 110A column (5 micron, 250  $\times$  10 mm)

Flow: 2 mL/min

Linear Gradient: 2.25% CH<sub>3</sub>CN increased per minute

Wavelength: 254 nm

File opened: E:\data\lixiaoxiao\purity\L-6-107-chundu2(00002,21;39;36).hw, where

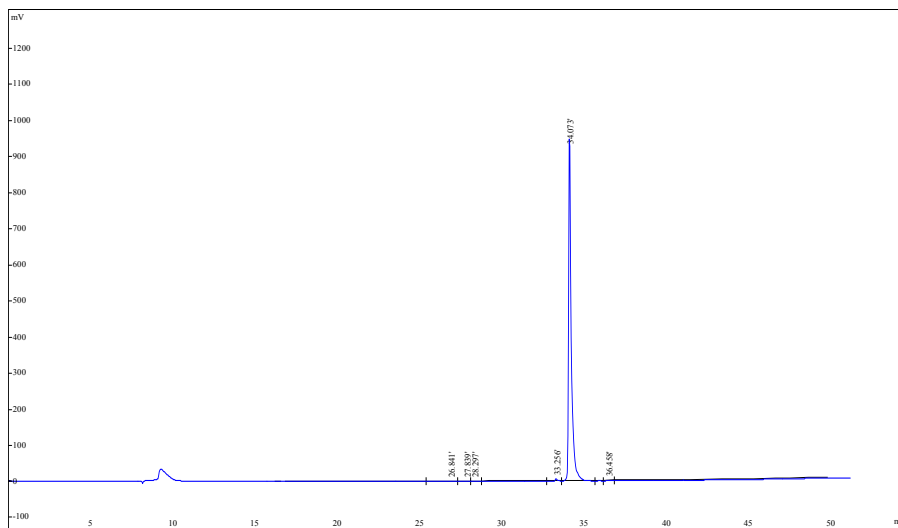

| Rank  | Time   | Name | Conc   | Area     |
|-------|--------|------|--------|----------|
| 1     | 26.841 |      | 0.2299 | 25531    |
| 2     | 27.839 |      | 0.3214 | 35698    |
| 3     | 28.297 |      | 0.2595 | 28825    |
| 4     | 33.256 |      | 0.7134 | 79234    |
| 5     | 34.073 |      | 98.29  | 10916350 |
| 6     | 36.458 |      | 0.1932 | 21463    |
| Total |        |      | 100    | 11107101 |

purity = 98.3%.

## 2.2. HPLC Data of Conjugate 9b

Sample: **9b**

HPLC Column; Gemini 5  $\mu$ m C18 110A column (5 micron, 250  $\times$  10 mm)

Flow: 2 mL/min

Linear Gradient: 2.25% CH<sub>3</sub>CN increased per minute

Wavelength: 254 nm

File Opened: E:\data\lixiaoxiao\purity\L-6-103A-chundu-3(00001,20;40;55).hw, where

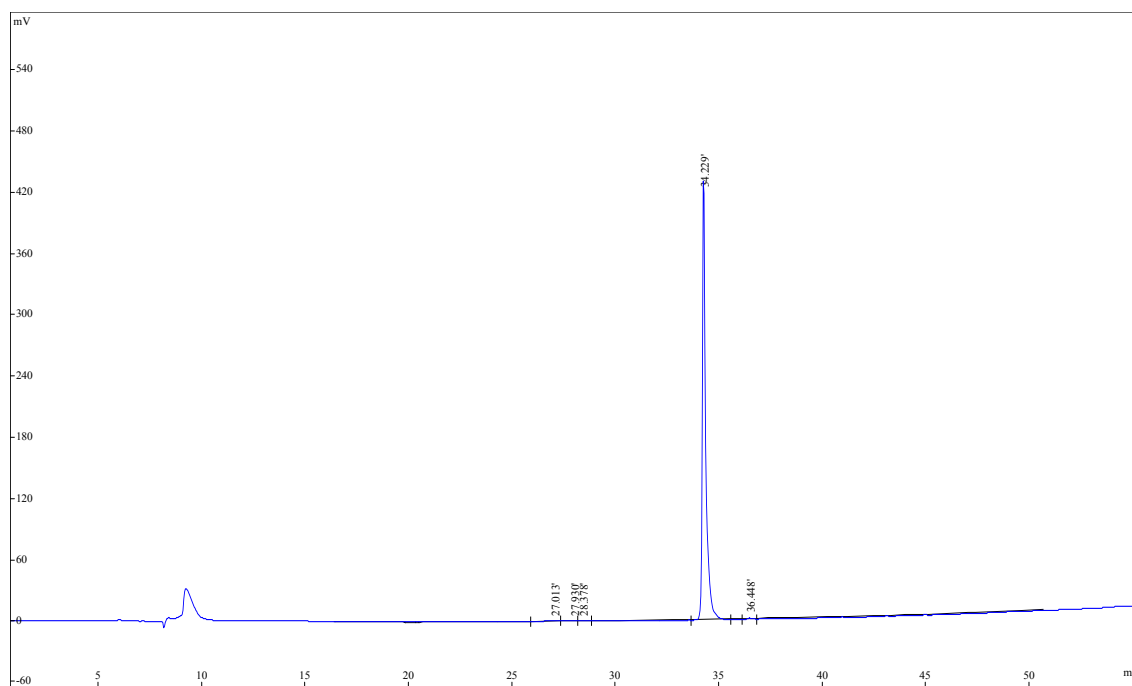

| Rank  | Time   | Name | Conc   | Area    |
|-------|--------|------|--------|---------|
| 1     | 27.013 |      | 0.4343 | 21965   |
| 2     | 27.930 |      | 0.6705 | 33915   |
| 3     | 28.378 |      | 0.5594 | 28294   |
| 4     | 34.229 |      | 97.91  | 4952175 |
| 5     | 36.448 |      | 0.4329 | 21895   |
| Total |        |      | 100    | 505824  |

purity = 97.9%.

## 2.3. HPLC Data of Conjugate 9c

Sample: 9c

HPLC Column; Gemini 5  $\mu\text{m}$  C18 110A column (5 micron, 250  $\times$  10 mm)

Flow: 2 mL/min

Linear Gradient: 2.25% CH<sub>3</sub>CN increased per minute

Wavelength: 254 nm

File opened: E:\data\lixiaoxiao\purity\L-6-106-chundu2-1(00001,12;47;45).hw, where

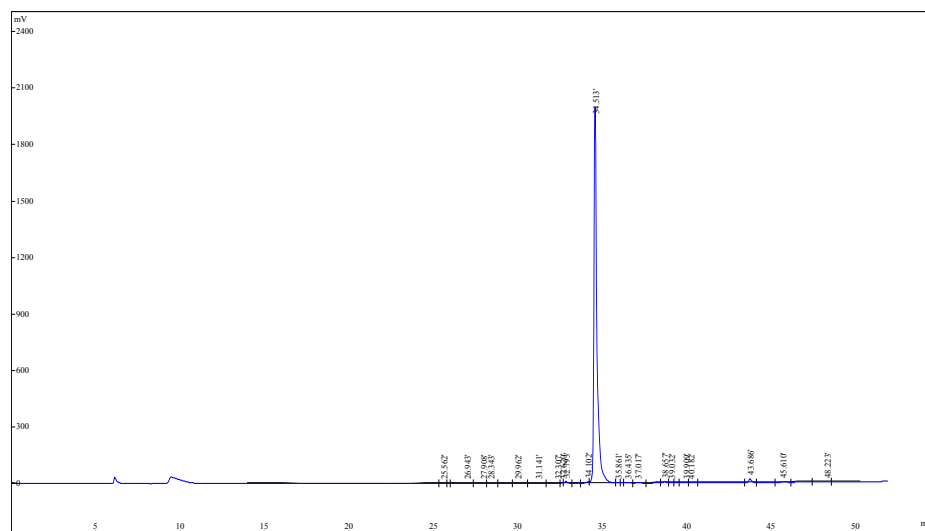

| Rank  | Time   | Name | Conc    | Area     |
|-------|--------|------|---------|----------|
| 1     | 25.562 |      | 0.07965 | 20737    |
| 2     | 26.943 |      | 0.1921  | 50013    |
| 3     | 27.908 |      | 0.2548  | 66345    |
| 4     | 28.343 |      | 0.2054  | 53469    |
| 5     | 29.962 |      | 0.09661 | 25152    |
| 6     | 31.141 |      | 0.1335  | 34755    |
| 7     | 32.307 |      | 0.2049  | 53344    |
| 8     | 32.620 |      | 0.1165  | 30335    |
| 9     | 32.793 |      | 0.3967  | 103281   |
| 10    | 34.102 |      | 0.444   | 115582   |
| 11    | 34.513 |      | 95.74   | 24925901 |
| 12    | 35.861 |      | 0.1066  | 27750    |
| 13    | 36.435 |      | 0.1845  | 48023    |
| 14    | 37.017 |      | 0.08039 | 20929    |
| 15    | 38.657 |      | 0.3009  | 78335    |
| 16    | 39.032 |      | 0.08618 | 22436    |
| 17    | 39.909 |      | 0.165   | 42951    |
| 18    | 40.182 |      | 0.08473 | 22057    |
| 19    | 43.686 |      | 0.8744  | 227629   |
| 20    | 45.610 |      | 0.14    | 36448    |
| 21    | 48.223 |      | 0.1113  | 28965    |
| Total |        |      | 100     | 26034437 |

purity = 95.7%.

## 2.4. HPLC Data of Conjugate 9d

Sample: 9d

HPLC Column; Gemini 5  $\mu\text{m}$  C18 110A column (5 micron, 250  $\times$  10 mm)

Flow: 2 mL/min

Linear Gradient: 2.25% CH<sub>3</sub>CN increased per minute

Wavelength: 254 nm

File opened: E:\data\lixiaoxiao\purity\L-6-105-chundu(00003,14;47;19).hw, where

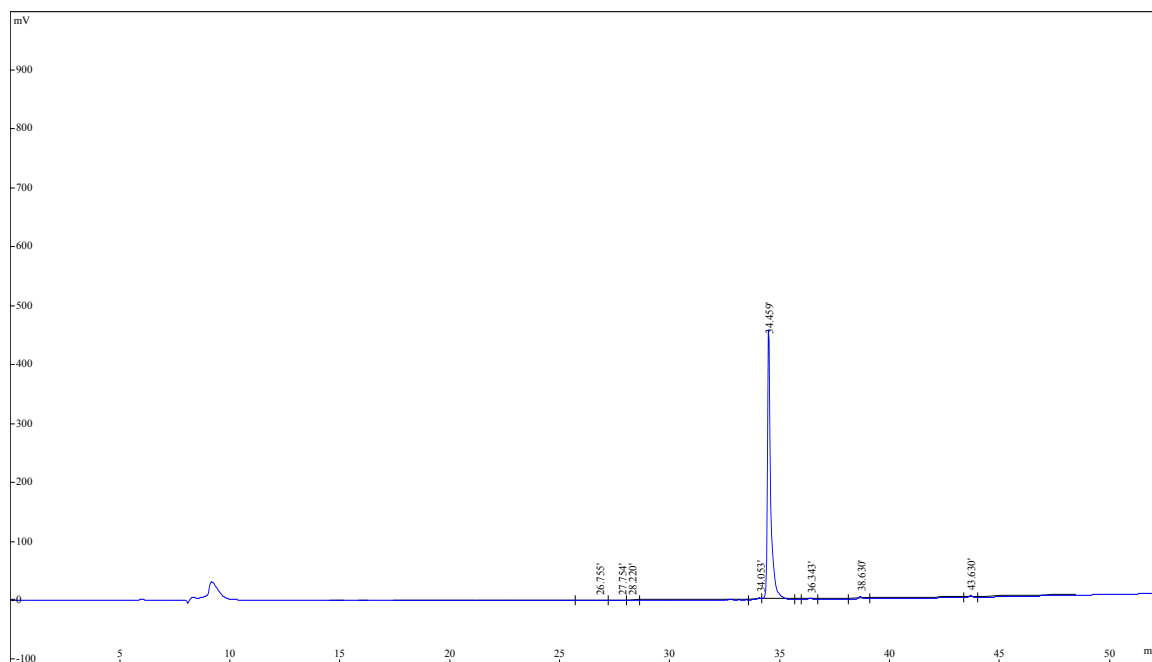

| Rank  | Time   | Name | Conc   | Area    |
|-------|--------|------|--------|---------|
| 1     | 26.755 |      | 0.4843 | 24620   |
| 2     | 27.754 |      | 0.6522 | 33158   |
| 3     | 28.220 |      | 0.533  | 27095   |
| 4     | 34.053 |      | 0.899  | 45703   |
| 5     | 34.459 |      | 95.41  | 4850458 |
| 6     | 36.343 |      | 0.4546 | 23109   |
| 7     | 38.630 |      | 0.8664 | 44049   |
| 8     | 43.630 |      | 0.706  | 35894   |
| Total |        |      | 100    | 5084086 |

purity = 95.4%.



## 2.5. HPLC Data of Conjugate 9e

Sample: 9e

HPLC Column; Gemini 5  $\mu$ m C18 110A column (5 micron, 250  $\times$  10 mm)

Flow: 2 mL/min

Linear Gradient: 2.25% CH<sub>3</sub>CN increased per minute

Wavelength: 254 nm

File opened: E:\data\lixiaoxiao\purity\L-6-104B-chundu2-2(00004,19;04;01).hw, where

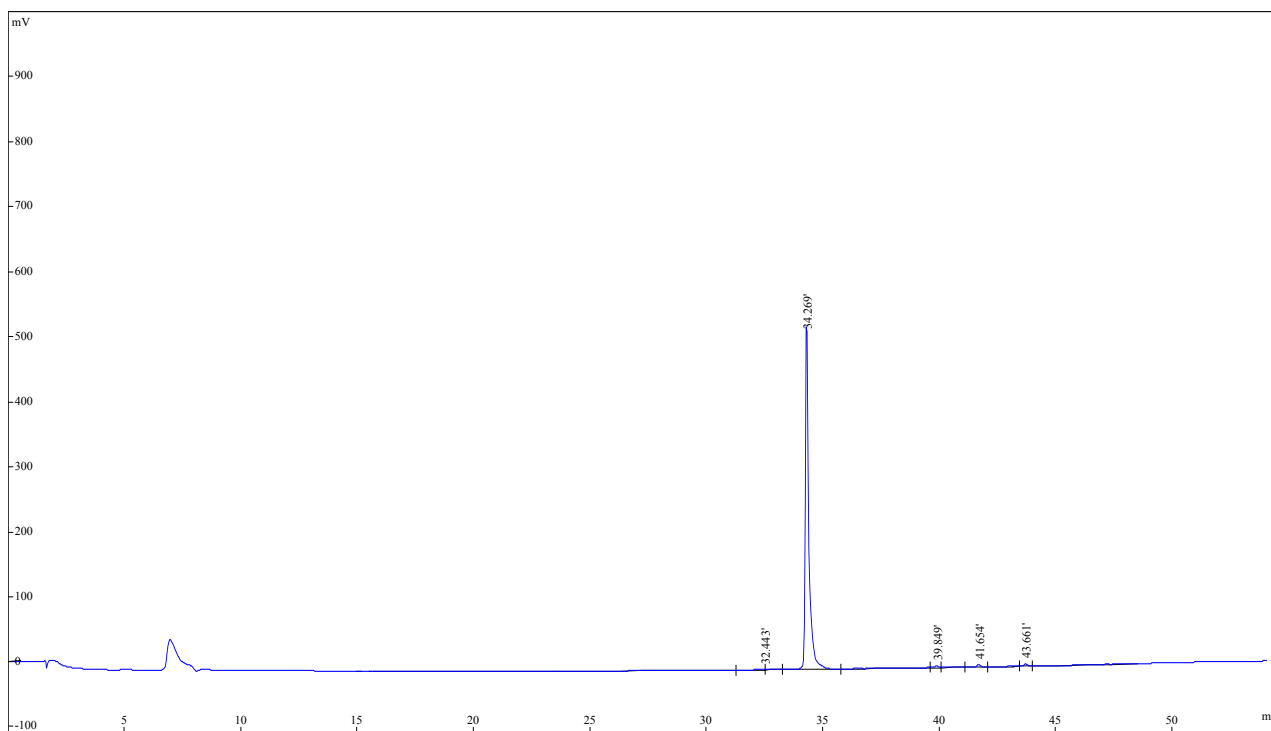

| Rank  | Time   | Name | Conc   | Area    |
|-------|--------|------|--------|---------|
| 1     | 32.443 |      | 0.365  | 21211   |
| 2     | 34.269 |      | 97.54  | 5668904 |
| 3     | 39.849 |      | 0.5991 | 34817   |
| 4     | 41.654 |      | 0.7889 | 45850   |
| 5     | 43.661 |      | 0.7073 | 41109   |
| Total |        |      | 100    | 5811891 |

purity = 97.5%.

2.6. HPLC Data of Conjugate **9f**Sample: **9f**HPLC column: Gemini 5  $\mu\text{m}$  C18 110A column (5 micron, 250  $\times$  10 mm)

Flow: 2 mL/min

Linear Gradient: 2.25%  $\text{CH}_3\text{CN}$  increased per minute

Wavelength: 254 nm

File opened: E:\data\lixiaoxiao\purity\L-6-103B-chundu2(00003,20;07;01).hw, where

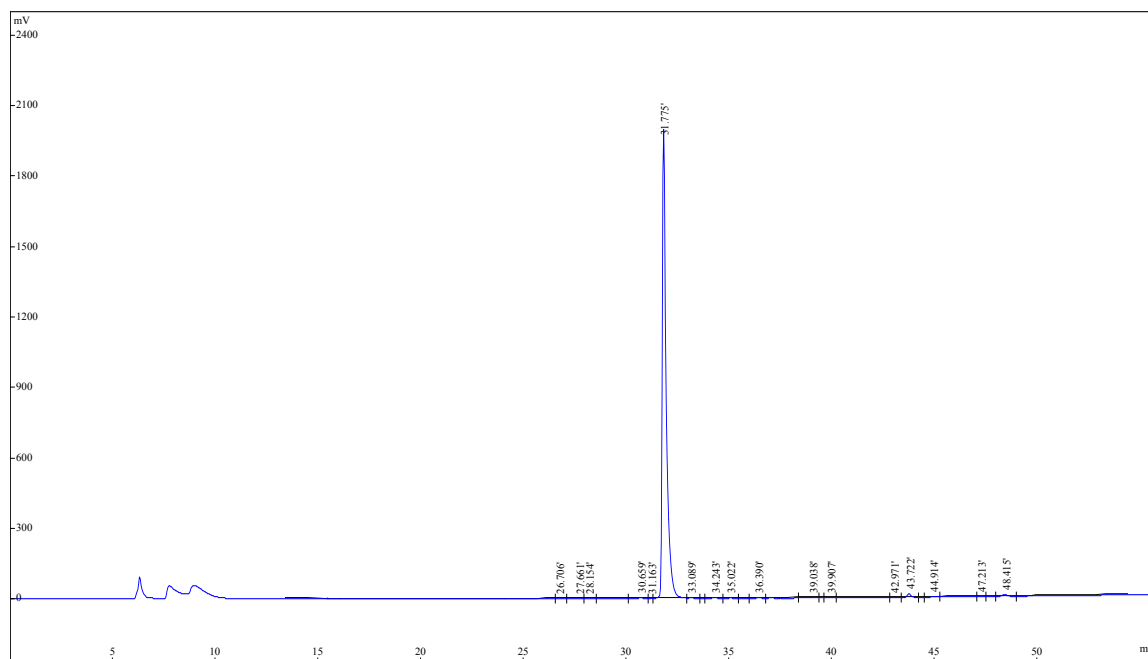

| Rank  | Time   | Name | Conc    | Area     |
|-------|--------|------|---------|----------|
| 1     | 26.706 |      | 0.0891  | 24687    |
| 2     | 27.661 |      | 0.1401  | 38817    |
| 3     | 28.154 |      | 0.103   | 28543    |
| 4     | 30.659 |      | 0.2529  | 70075    |
| 5     | 31.163 |      | 0.09092 | 25192    |
| 6     | 31.775 |      | 96.8    | 26818893 |
| 7     | 33.089 |      | 0.2187  | 60940    |
| 8     | 34.243 |      | 0.22    | 30335    |
| 9     | 35.022 |      | 0.1131  | 31344    |
| 10    | 36.390 |      | 0.09268 | 25679    |
| 11    | 39.038 |      | 0.2183  | 60470    |
| 12    | 39.907 |      | 0.1172  | 32467    |
| 13    | 42.971 |      | 0.1245  | 34507    |
| 14    | 43.722 |      | 0.691   | 191456   |
| 15    | 44.914 |      | 0.1281  | 35487    |
| 16    | 47.213 |      | 0.07504 | 20791    |
| 17    | 48.415 |      | 0.5319  | 147368   |
| Total |        |      | 100     | 27707302 |

purity = 96.8%.

## 2.7. HPLC Data of Conjugate 9g

Sample: 9g

HPLC Column: Gemini 5  $\mu$ m C18 110A column (5 micron, 250  $\times$  10 mm)

Flow: 2 mL/min

Linear Gradient: 2.25% CH<sub>3</sub>CN increased per minute

Wavelength: 254 nm

File Opened: E:\data\lixiaoxiao\purity\L-6-104A-chundu2-2(00002,16;44;03).hw, where

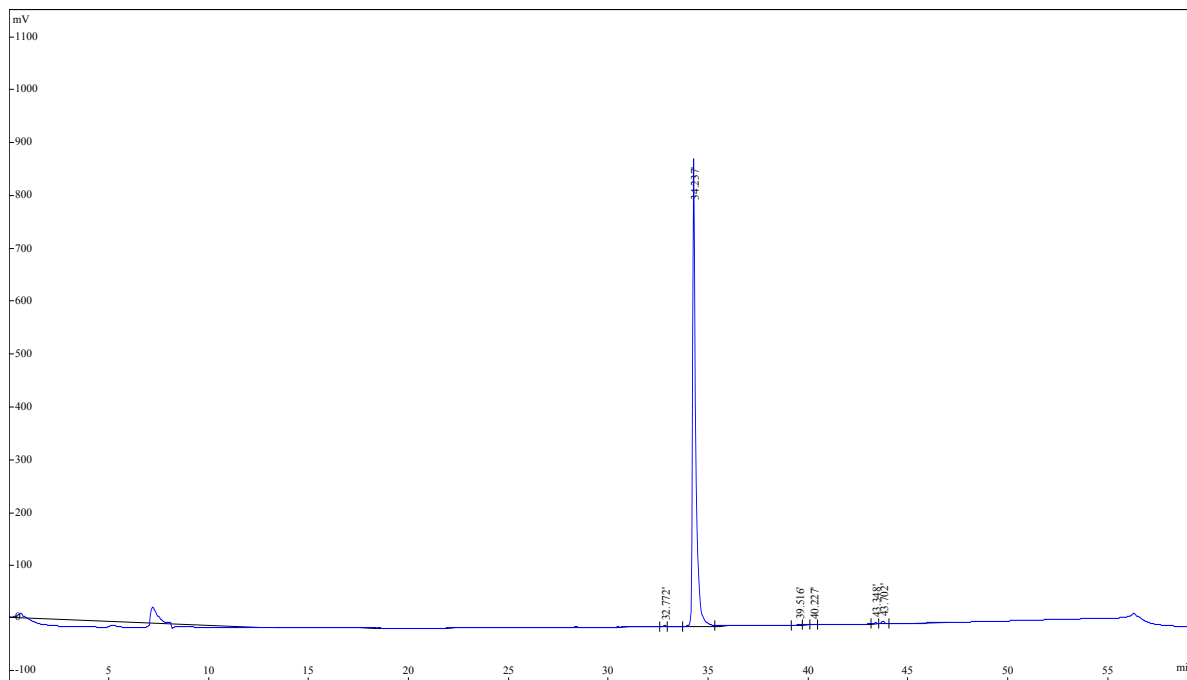

| Rank  | Time   | Name | Conc   | Area    |
|-------|--------|------|--------|---------|
| 1     | 32.772 |      | 0.2435 | 23583   |
| 2     | 34.237 |      | 98.49  | 9538024 |
| 3     | 39.516 |      | 0.2069 | 20031   |
| 4     | 40.227 |      | 0.2148 | 20805   |
| 5     | 43.348 |      | 0.2509 | 24296   |
| 6     | 43.702 |      | 0.5922 | 57344   |
| Total |        |      | 100    | 9684083 |

purity = 98.5%.

## 2.8. HPLC Data of Conjugate 9h

Sample: 9h

HPLC Column: Gemini 5  $\mu\text{m}$  C18 110A column (5 micron, 250  $\times$  10 mm)

Flow: 2 mL/min

Linear Gradient: 2.25% CH<sub>3</sub>CN increased per minute

Wavelength: 254 nm

File opened: E:\data\lixiaoxiao\purity\L-6-99-chundu3(00009,23;49;18).hw, where

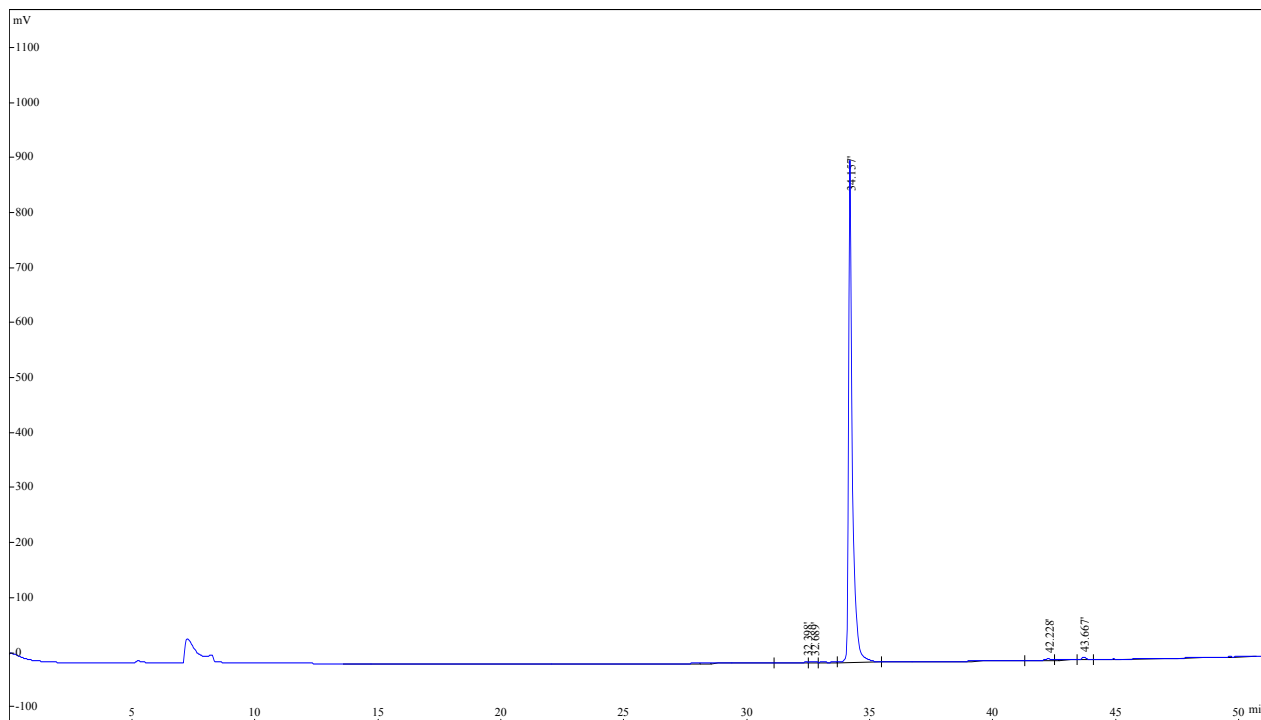

| Rank  | Time   | Name | Conc   | Area    |
|-------|--------|------|--------|---------|
| 1     | 32.398 |      | 0.3225 | 31858   |
| 2     | 32.689 |      | 0.2824 | 27899   |
| 3     | 34.157 |      | 98.31  | 9711040 |
| 4     | 42.228 |      | 0.4565 | 45096   |
| 5     | 43.667 |      | 0.6359 | 62821   |
| Total |        |      | 100    | 9878714 |

purity = 98.3%.

## 2.9. HPLC Data of Conjugate 13

Sample: 13

HPLC Column: Gemini 5  $\mu$ m C18 110A column (5 micron, 250  $\times$  10 mm)

Flow: 2 mL/min

Linear Gradient: 2.25% CH<sub>3</sub>CN increased per minute

Wavelength: 254 nm

File opened: E:\data\lixiaoxiao\purity\L-6-98-chundu(00008,22;53;34).hw, where

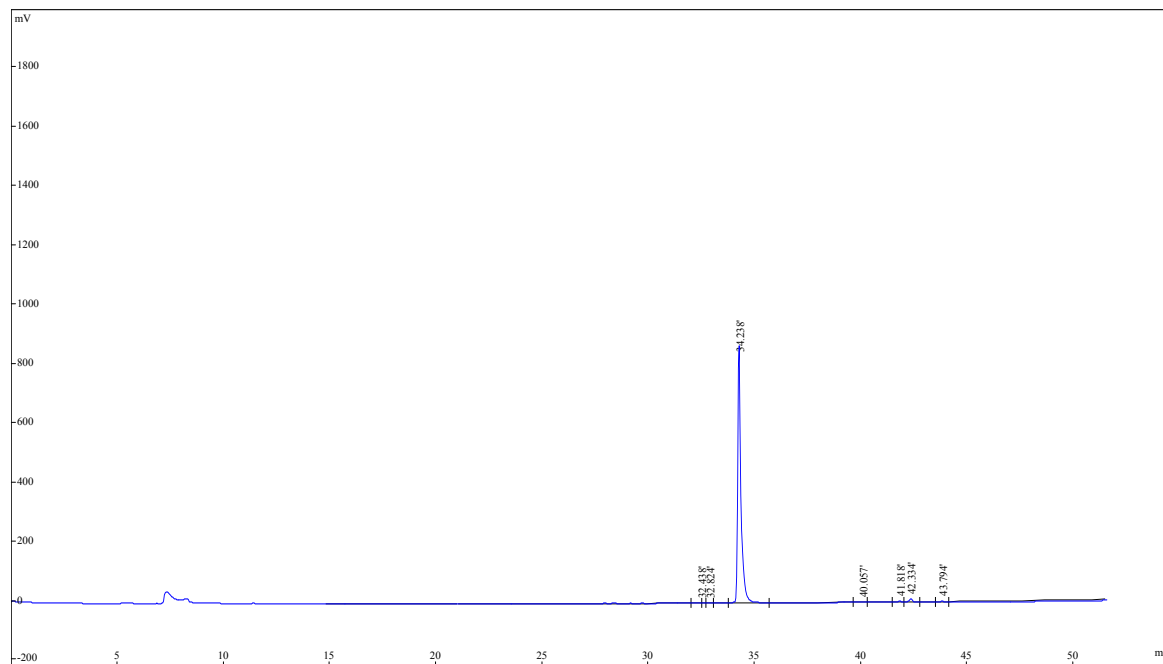

| Rank  | Time   | Name | Conc   | Area     |
|-------|--------|------|--------|----------|
| 1     | 32.438 |      | 0.2352 | 23424    |
| 2     | 32.824 |      | 0.2352 | 23421    |
| 3     | 34.238 |      | 95.68  | 9527221  |
| 4     | 40.057 |      | 0.5703 | 56784    |
| 5     | 41.818 |      | 0.8089 | 80544    |
| 6     | 42.334 |      | 96.8   | 26818893 |
| 7     | 43.794 |      | 0.6252 | 62256    |
| Total |        |      | 100    | 9957941  |

purity = 95.7%.
